# Supplementary material
Source: Springer Nature journal article supplement (https://www.springermedizin.de/resource/supplementary/12997_2009_69_MOESM3_ESM.pdf/9623262)

## Active sensitization

Cyclophosphamide  
30mg/kg ip

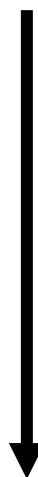

OVA + Al(OH)<sub>3</sub> ip.  
2mg 100mg

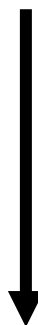

OVA + Al(OH)<sub>3</sub> ip.  
0.01mg 100mg

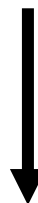

-2day

0

3W

Measurement of  
cough reflex sensitivity

Procaterol ip.  
0.1mg/kg

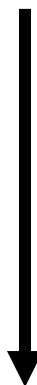

0.5h

OVA inhalation  
challenge

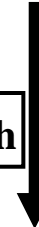

0.5h

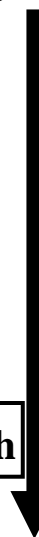

6W+1day

First vehicle  
or ONO 1714

ENO measurement  
and BAL

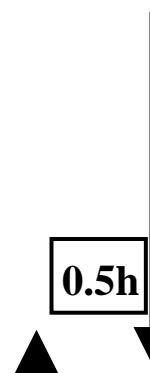

0.5h

6W+2days

Second vehicle  
or ONO 1714

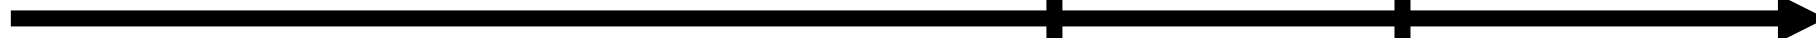

Supplement: MOESM3 [file 9623262]
